# Supplementary figures and images for: Lessons Learnt from the Revitalisation of Chemical Factory in Marktredwitz and River Banks Downstream: When ‘Renaturation’ Can Be Harmful
Source: MDPI journal article supplement (doi:10.3390/w14213481), 2022-10-31

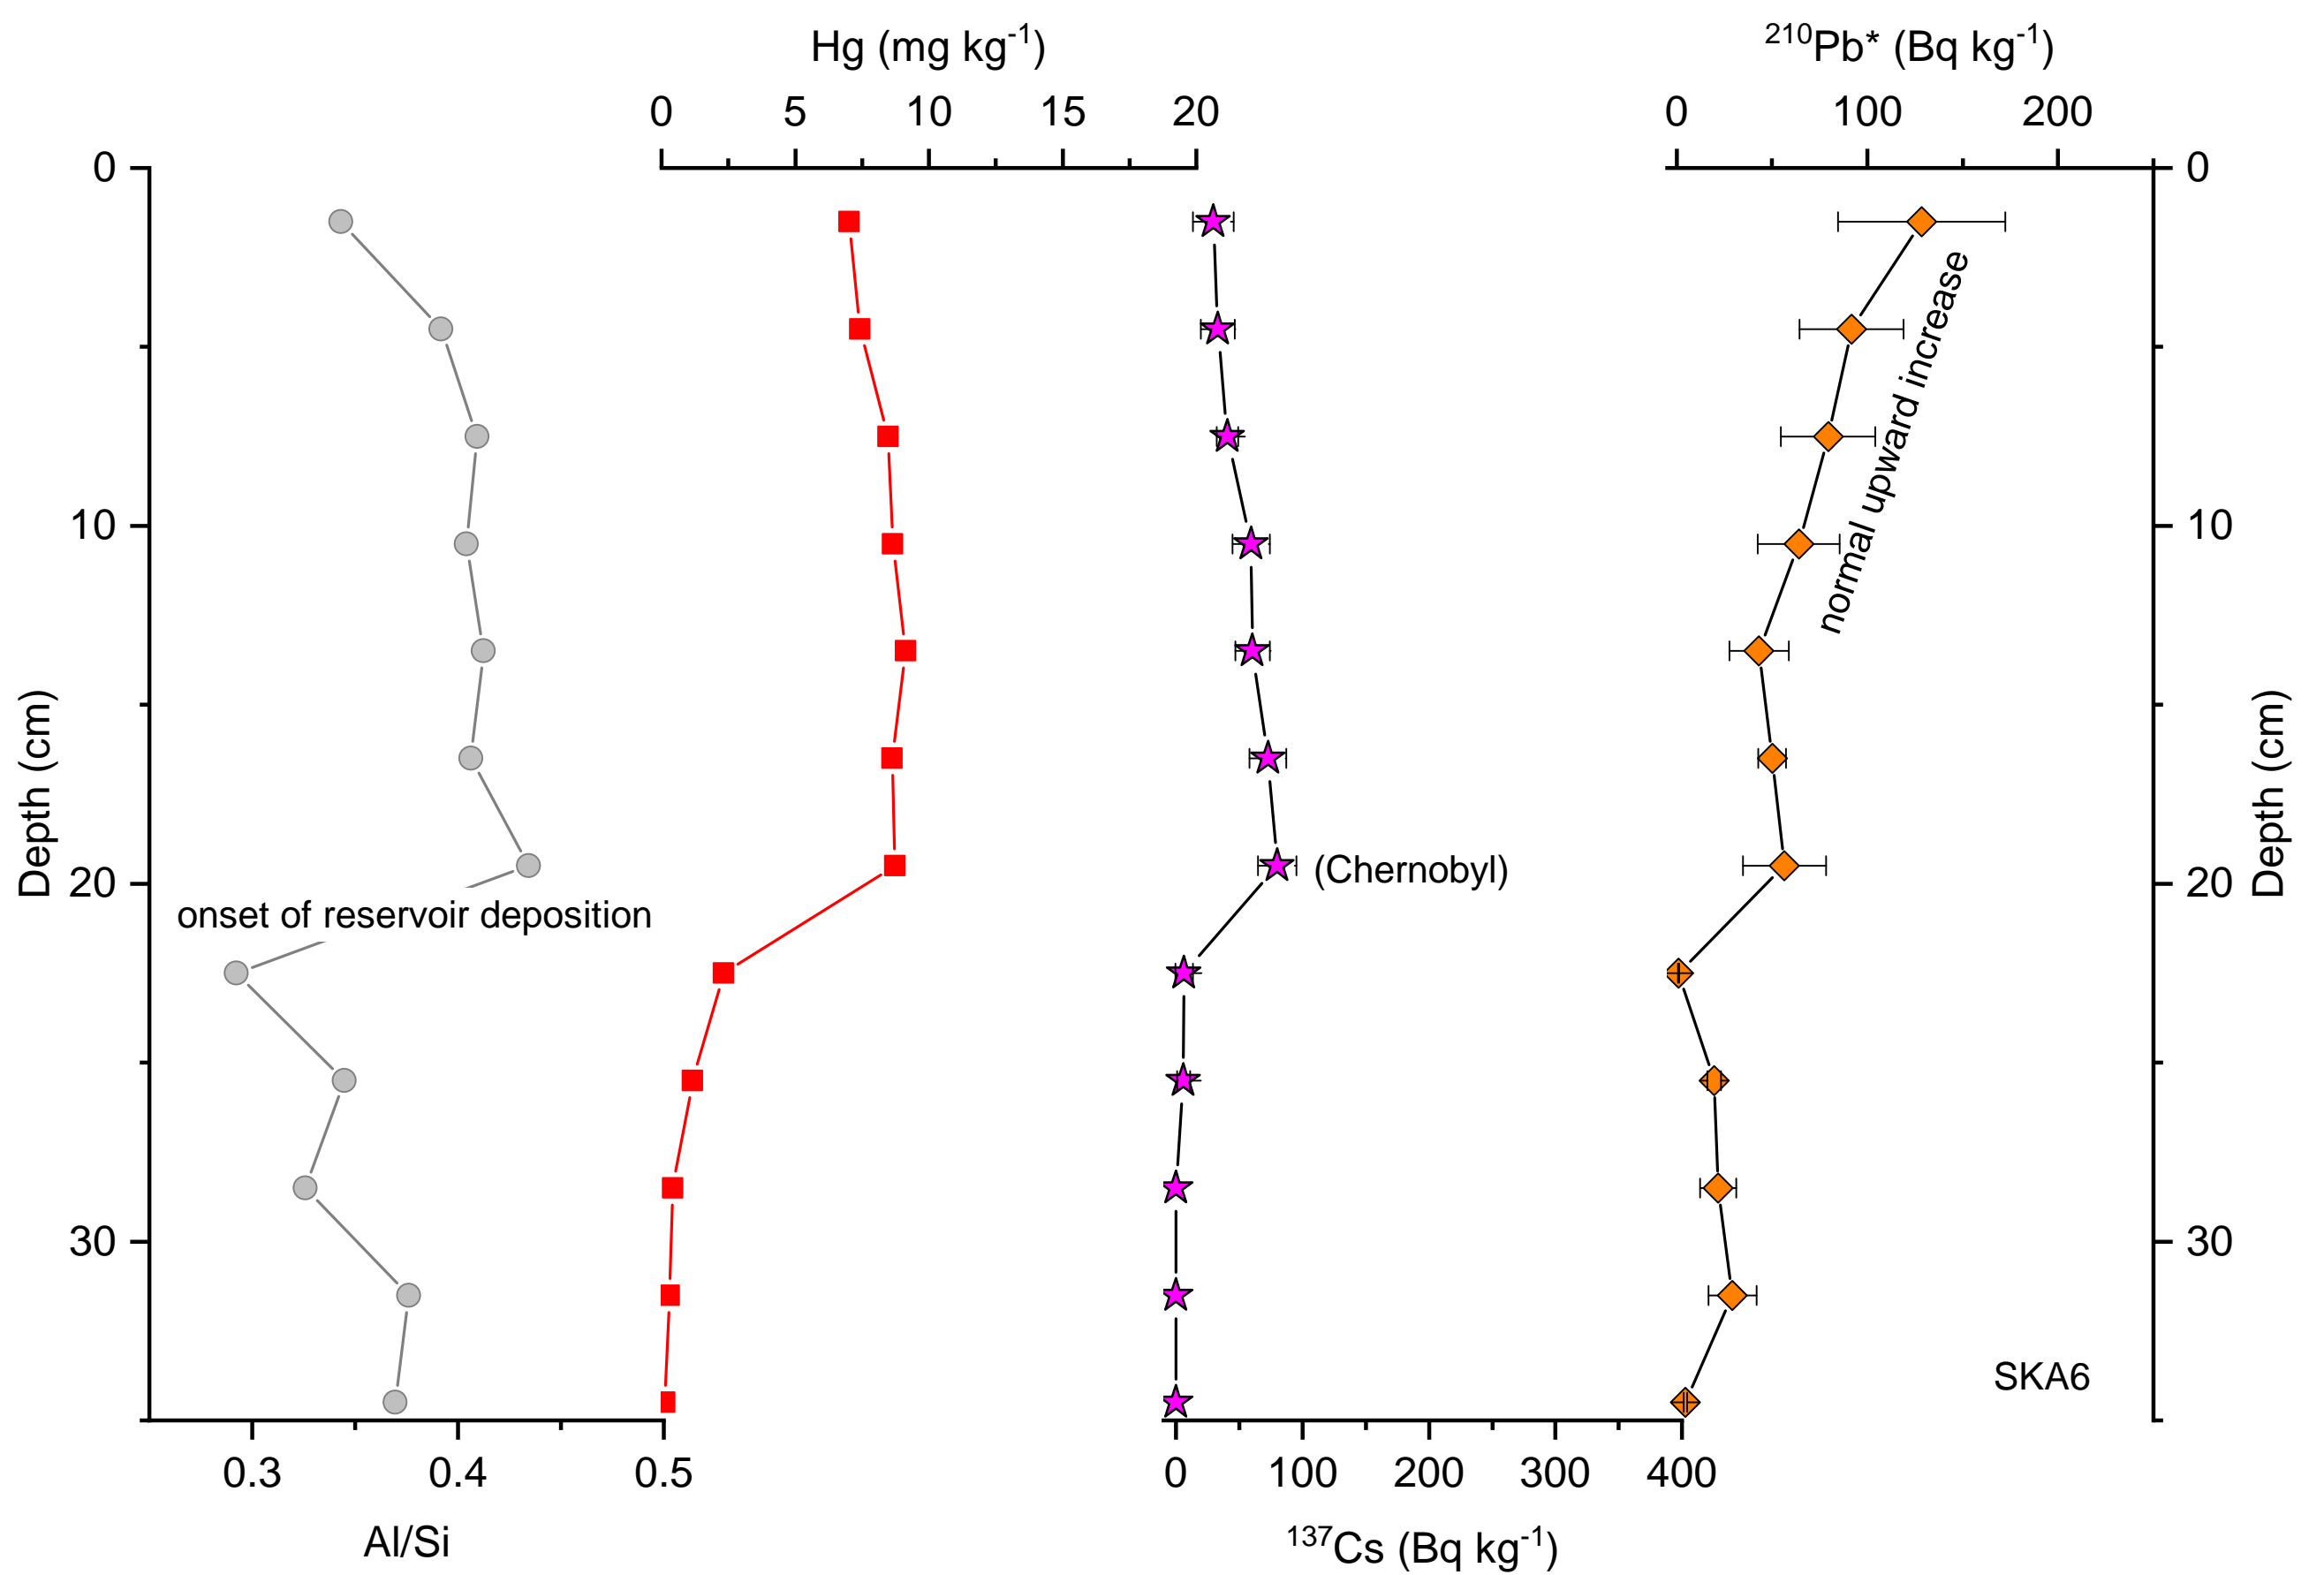

Supplement: s1 [file s1]

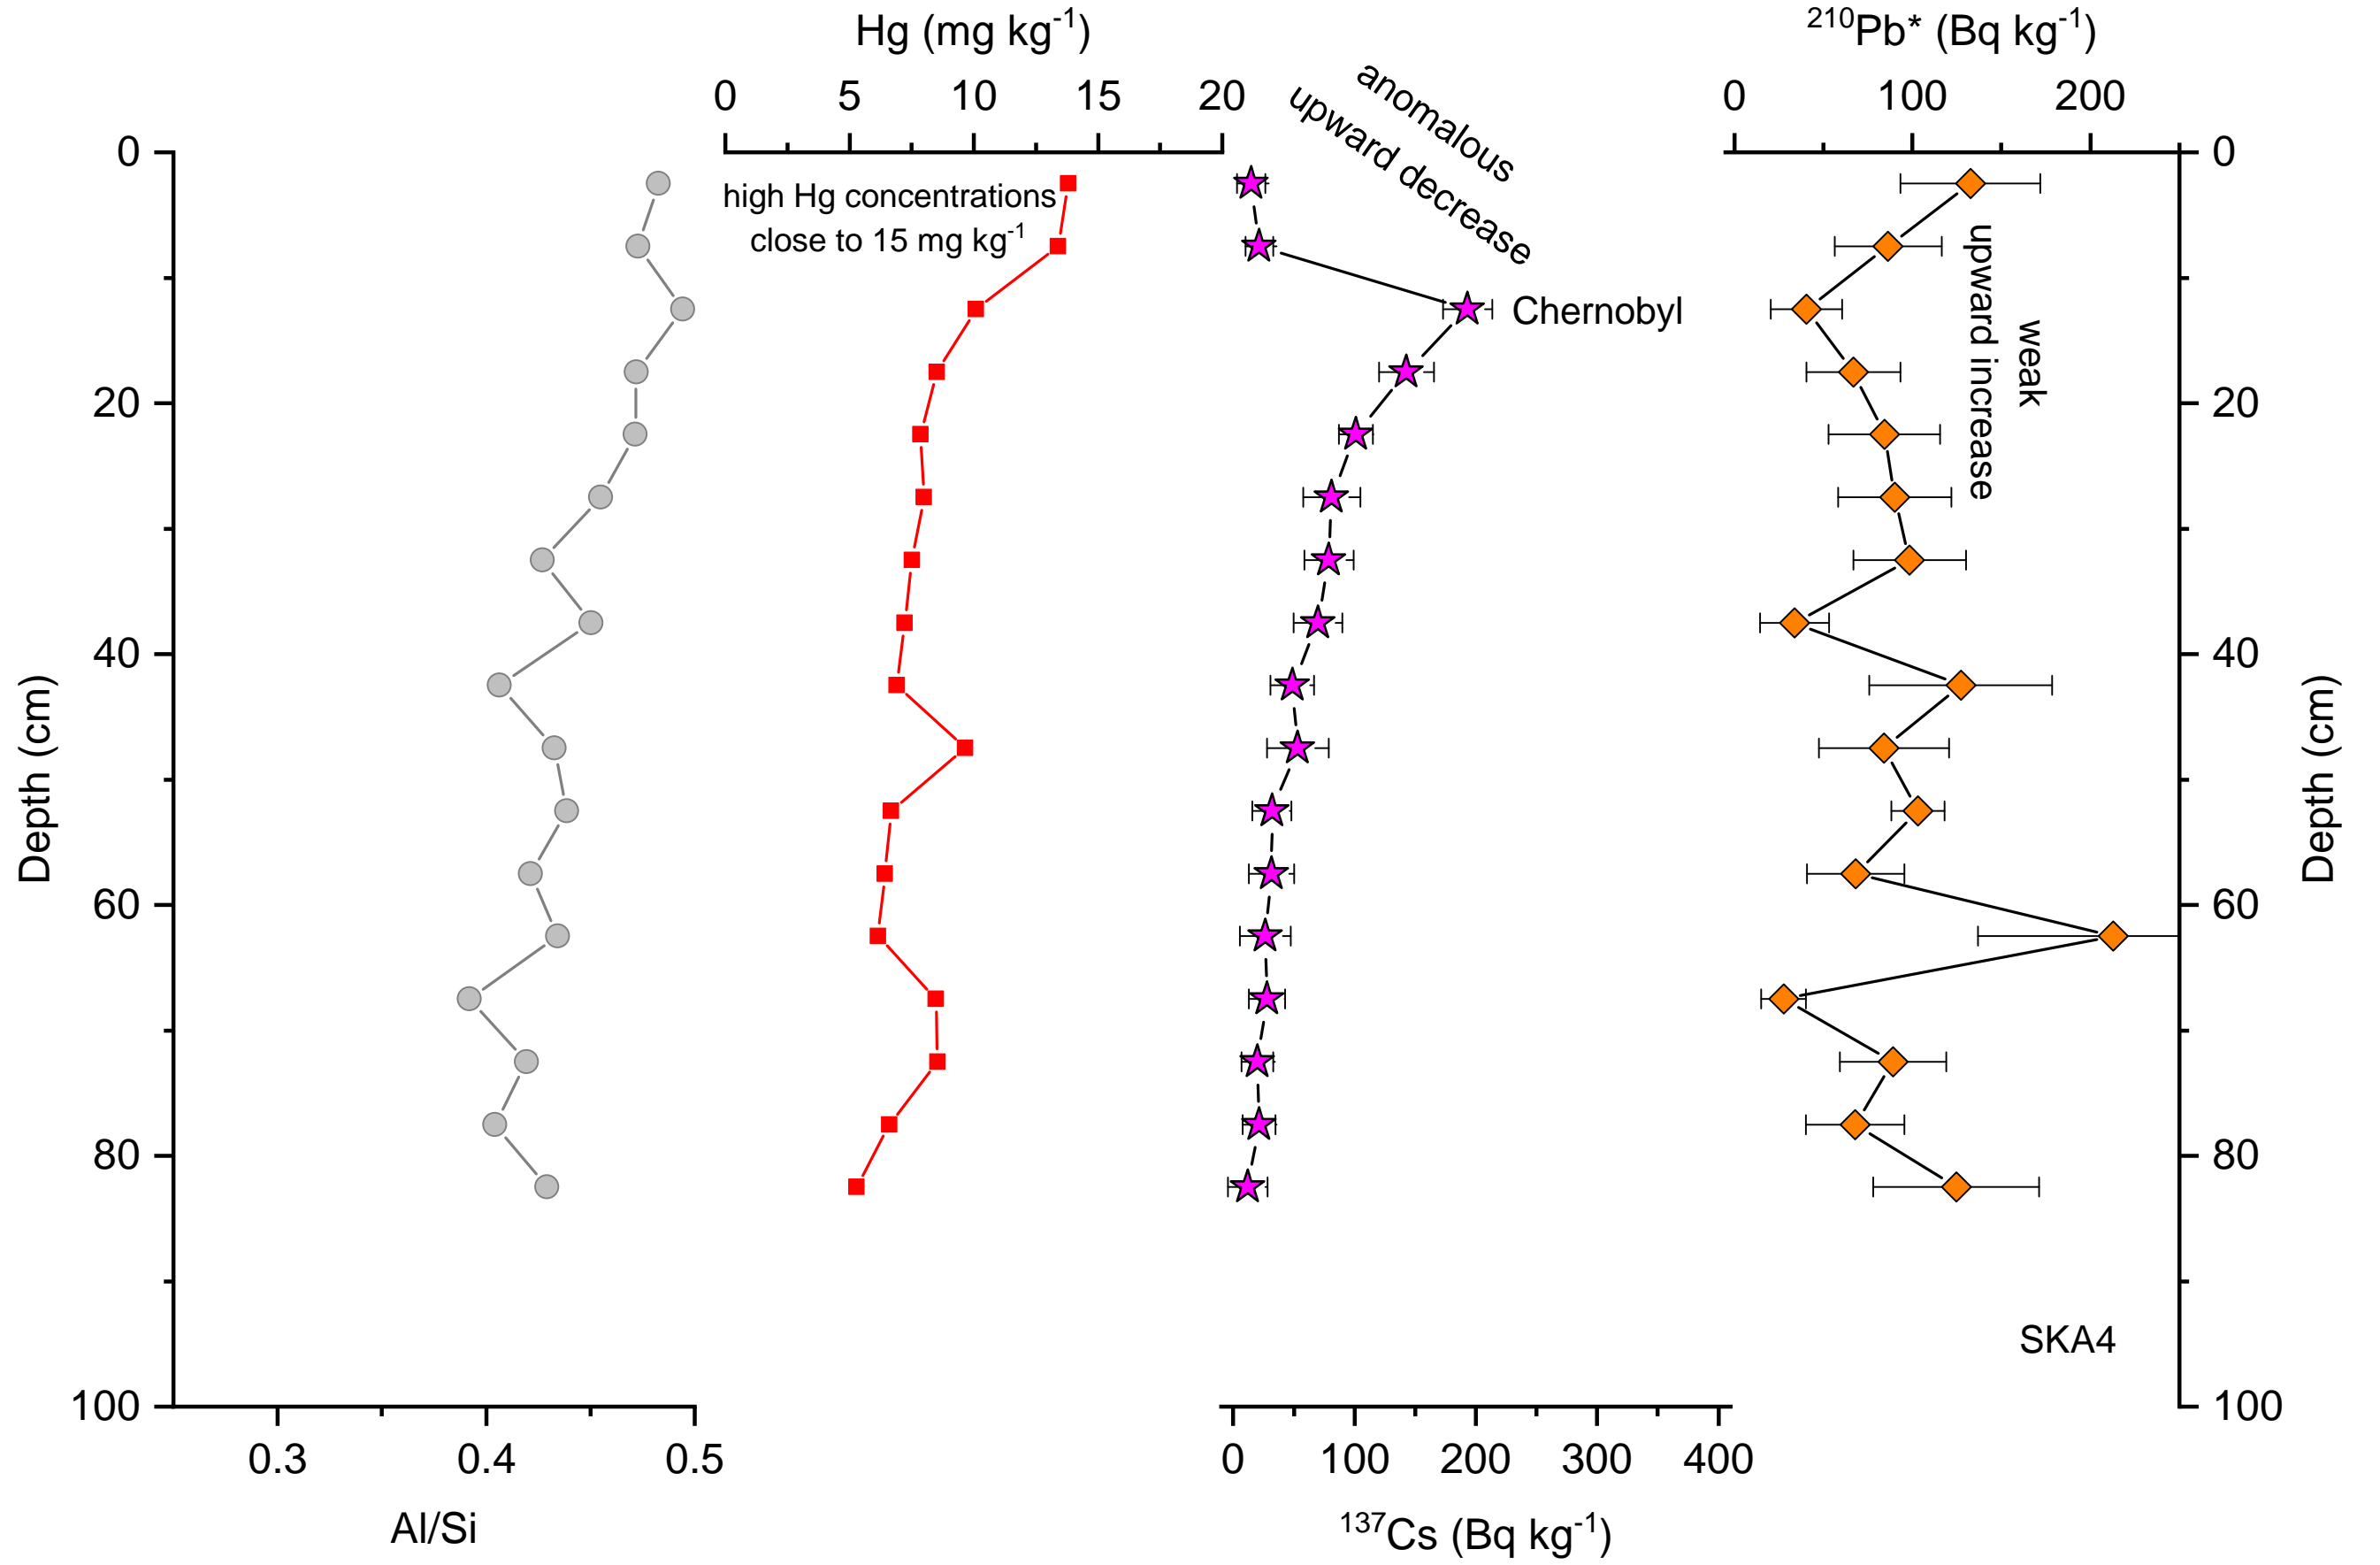

Supplement: s1 [file s1]

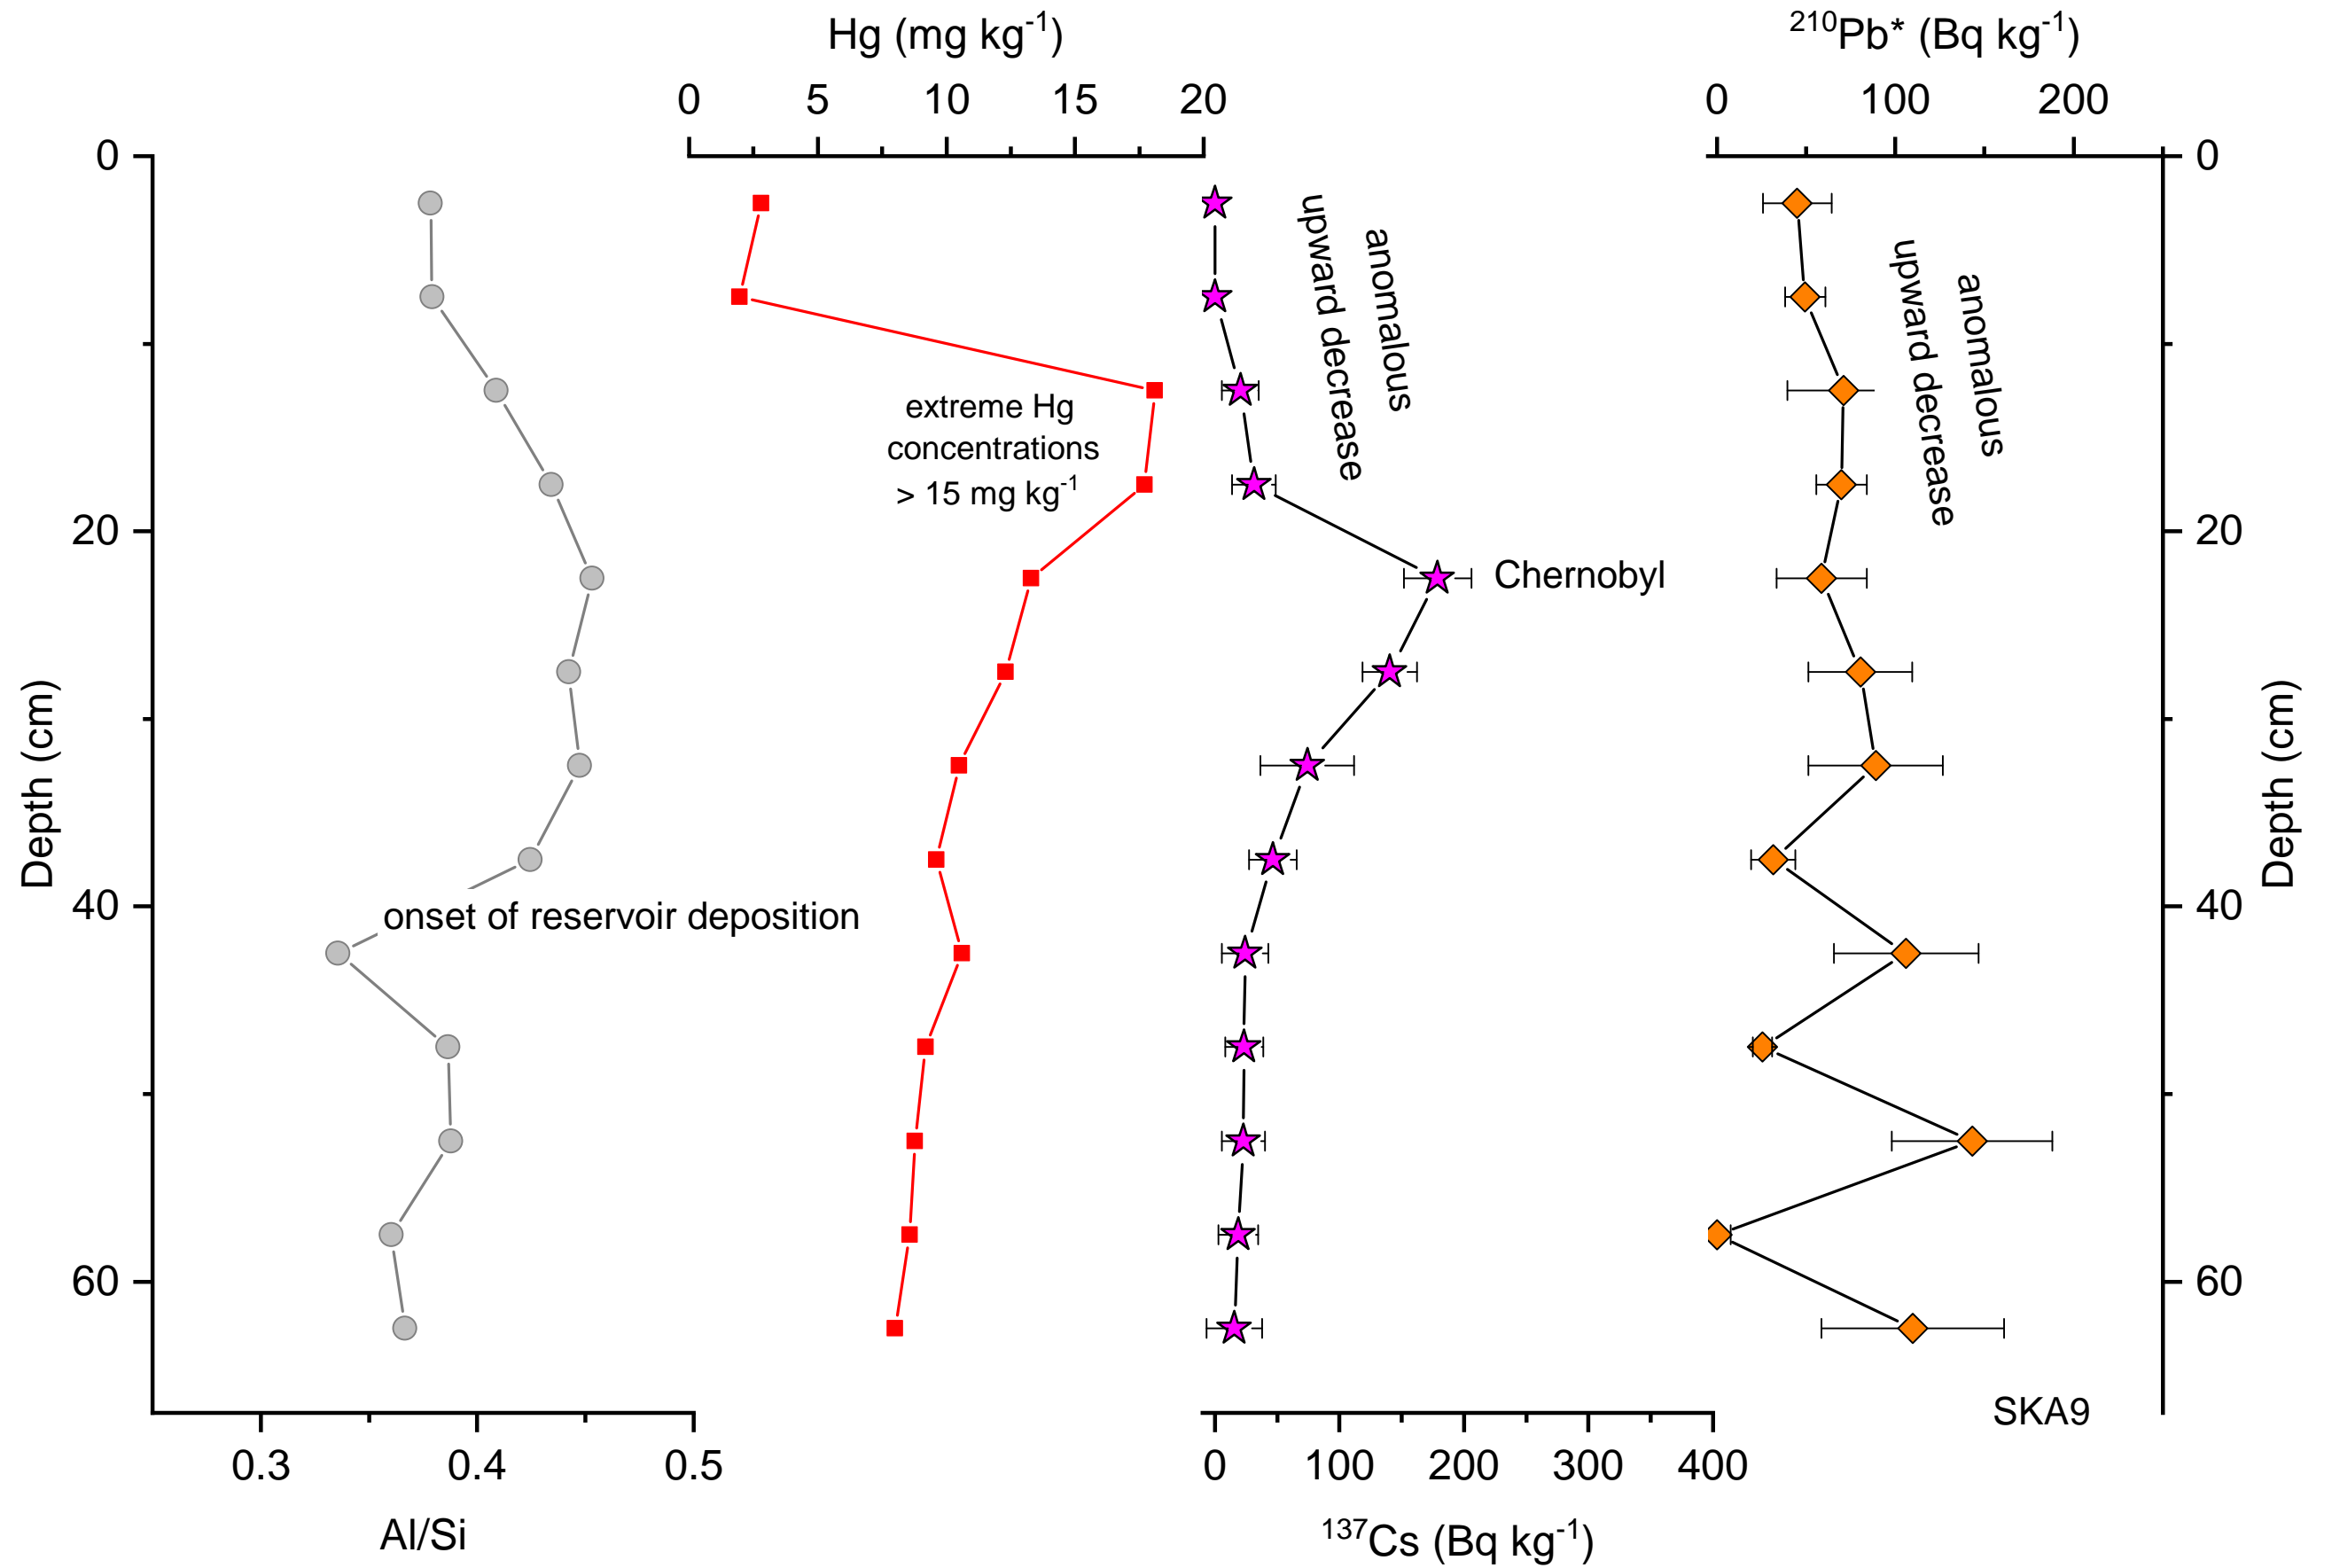

Supplement: s1 [file s1]
